# Supplementary material for: Antimicrobial Efficiency of Chitosan and Its Methylated Derivative against Lentilactobacillus parabuchneri Biofilms
Source: MDPI journal article supplement (doi:10.3390/molecules27248647), 2022-12-07
Supplement: s1 [file s1]

## Supplementary Materials

# Antimicrobial efficiency of chitosan and its methylated derivative against *Lentilactobacillus parabuchneri* biofilms

Diellza Bajrami<sup>1</sup>, Stephan Fischer<sup>2</sup>, Holger Barth<sup>2</sup>, Syed Imdadul Hossain<sup>3,4</sup>, Nicola Cioffi<sup>3,4</sup>, Boris Mizaikoff<sup>1,5\*</sup>

<sup>1</sup> Institute of Analytical and Bioanalytical Chemistry, Ulm University, Albert Einstein-Allee 11, 89081 Ulm, Germany

<sup>2</sup> Institute of Pharmacology and Toxicology, Ulm University Medical Center, Albert Einstein-Allee 11, 89081 Ulm, Germany

<sup>3</sup> Chemistry Department, University of Bari "Aldo Moro", V. Orabona, 4, 70126, Bari, Italy

<sup>4</sup> CSGI (Center for Colloid and Surface Science) c/o Chemistry Department, via E. Orabona, 4, 70126 Bari, Italy

<sup>5</sup> Hahn-Schickard, Institute for Microanalysis Systems, Sedanstrasse 14, 89077 Ulm, Germany

\* Correspondence: boris.mizaikoff@uni-ulm.de; Tel.: +49-731-50-22750 (B.M)

**Table S1.** Oxygen level values measured by optical fiber oxygen flow-microsensor during IR-ATR biofilm formation for 48 h. The values are presented as the mean of three replicates  $\pm$  standard deviation (SD).

| Time/min | O <sub>2</sub> levels during <i>L. p.</i> biofilm inhibition by chitosan (mg/mL) | O <sub>2</sub> levels during <i>L. p.</i> biofilm inhibition by TMC (mg/mL) |
|----------|----------------------------------------------------------------------------------|-----------------------------------------------------------------------------|
| 2        | 4.02 $\pm$ 0.3                                                                   | 4.46 $\pm$ 0.5                                                              |
| 4        | 3.78 $\pm$ 0.6                                                                   | 3.74 $\pm$ 0.7                                                              |
| 6        | 3.68 $\pm$ 0.5                                                                   | 3.52 $\pm$ 0.3                                                              |
| 8        | 3.61 $\pm$ 0.3                                                                   | 3.4 $\pm$ 0.6                                                               |
| 10       | 3.54 $\pm$ 0.3                                                                   | 3.35 $\pm$ 0.8                                                              |
| 12       | 3.48 $\pm$ 0.6                                                                   | 3.1 $\pm$ 0.5                                                               |
| 14       | 3.33 $\pm$ 0.5                                                                   | 2.91 $\pm$ 0.6                                                              |
| 16       | 3.27 $\pm$ 0.7                                                                   | 2.61 $\pm$ 0.3                                                              |
| 18       | 3.11 $\pm$ 0.9                                                                   | 2.43 $\pm$ 0.7                                                              |
| 20       | 3.14 $\pm$ 0.3                                                                   | 2.31 $\pm$ 0.7                                                              |
| 22       | 3.04 $\pm$ 0.5                                                                   | 2.03 $\pm$ 0.6                                                              |
| 24       | 2.9 $\pm$ 1.0                                                                    | 1.98 $\pm$ 0.5                                                              |
| 26       | 2.7 $\pm$ 0.6                                                                    | 1.9 $\pm$ 0.7                                                               |
| 28       | 2.68 $\pm$ 0.8                                                                   | 1.79 $\pm$ 0.5                                                              |
| 30       | 2.3 $\pm$ 1.0                                                                    | 1.64 $\pm$ 0.3                                                              |
| 32       | 2.1 $\pm$ 0.5                                                                    | 1.52 $\pm$ 0.8                                                              |
| 34       | 1.92 $\pm$ 0.5                                                                   | 1.42 $\pm$ 0.5                                                              |
| 36       | 1.78 $\pm$ 0.2                                                                   | 1.35 $\pm$ 0.6                                                              |
| 38       | 1.54 $\pm$ 0.3                                                                   | 1.2 $\pm$ 1.5                                                               |
| 40       | 1.42 $\pm$ 0.8                                                                   | 1.16 $\pm$ 0.6                                                              |
| 42       | 1.3 $\pm$ 0.7                                                                    | 1.08 $\pm$ 0.2                                                              |
| 44       | 1.27 $\pm$ 0.2                                                                   | 1 $\pm$ 0.7                                                                 |
| 46       | 1.13 $\pm$ 0.4                                                                   | 0.98 $\pm$ 0.4                                                              |
| 48       | 1 $\pm$ 0.6                                                                      | 0.95 $\pm$ 0.5                                                              |

## 1. Chemometric modeling

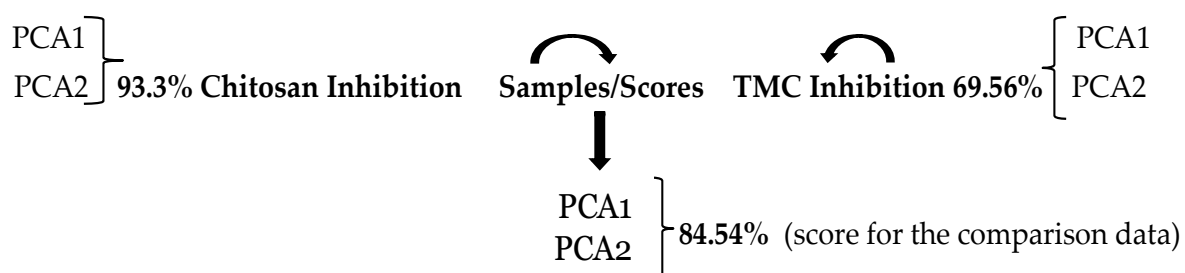

**Figure S1.** PCA score values for the models of variance build upon IR datasets of *L. parabuchneri* biofilm inhibition from chitosan and its quaternized derivative TMC.

## 2. SEM studies

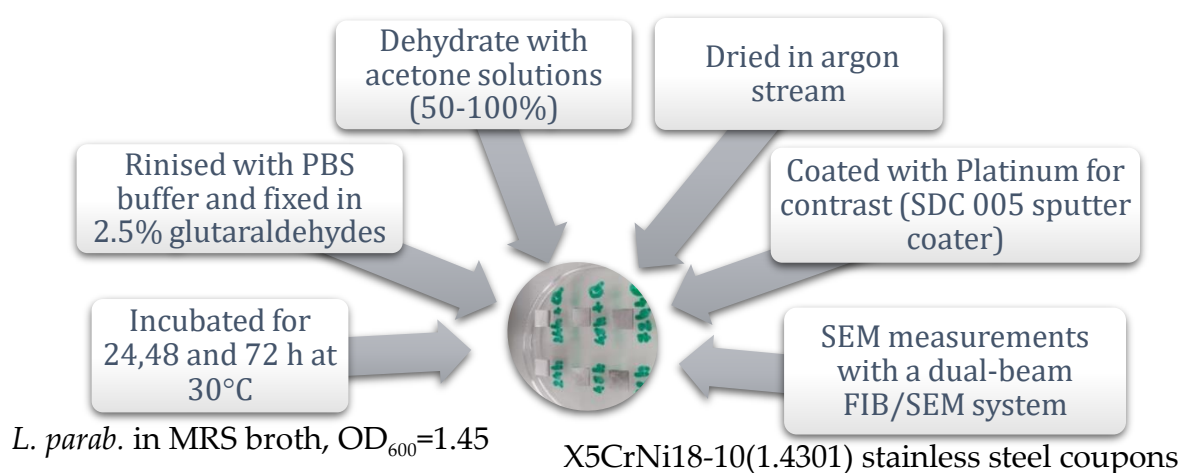

**Figure S2.** Schematic representation of stainless-steel treatment prior performance of SEM measurements.

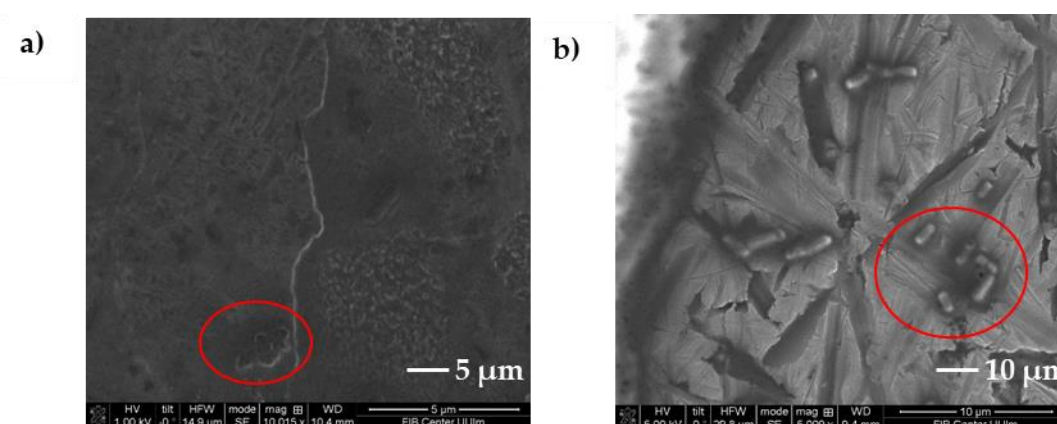

**Figure S3.** Disintegration of the biofilm matrix into individual cells as a result of inhibition efficiency by the addition of a) 0.05 % Chitosan stock solution and b) TMC derivative. Red circles correlate to separated bacterial cells.

### 3. Fluorescence sensing

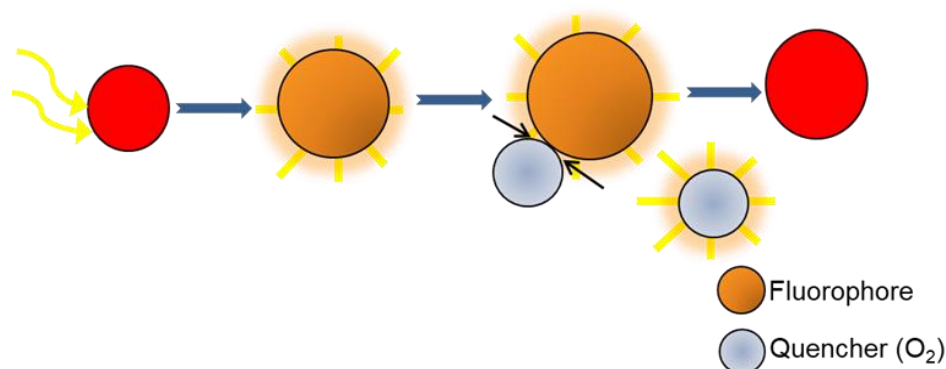

**Figure S4.** Fundamentals of fluorescence quenching in the presence of the oxygen as a quencher causing collision.

The degree of fluorescence quenching depends on the concentration, pressure, and temperature of the oxygen-containing medium. Almost all long-lived fluorophores dissolved in organic solvents can be used as oxygen sensors. Oxygen sensor spots used in this study were composed of platinum (II)- 5,10,15,20- tetrakis-(2,3,4,5,6-pentafluorophenyl) porphyrin (PtTFPP) with an excellent oxygen response [69,71,110].

### References

69. Ganesh, A.B.; Radhakrishnan, T.K. Fiber-Optic Sensors for the Estimation of Oxygen Gradients within Biofilms on Metals. *Opt. Lasers Eng.* **2008**, *46*, 321–327. <https://doi.org/10.1016/j.optlaseng.2007.11.003>.
71. Scheicher, S.R.; Kainz, B.; Köstler, S.; Suppan, M.; Bizzarri, A.; Pum, D.; Sleytr, U.B.; Ribitsch, V. Optical Oxygen Sensors Based on Pt(II) Porphyrin Dye Immobilized on S-Layer Protein Matrices. *Biosens. Bioelectron.* **2009**, *25*, 797–802. <https://doi.org/10.1016/j.bios.2009.08.030>.
110. McDonagh, C.; Kolle, C.; McEvoy, A.K.; Dowling, D.L.; Cafolla, A.A.; Cullen, S.J.; MacCraith, B.D. Phase Fluorometric Dissolved Oxygen Sensor. *Sens. Actuators B Chem.* **2001**, *74*, 124–130. [https://doi.org/10.1016/S0925-4005\(00\)00721-8](https://doi.org/10.1016/S0925-4005(00)00721-8)
